# Supplementary material
Source: Springer Nature journal article supplement (https://www.springermedizin.de/resource/supplementary/12955_2003_64_MOESM3_ESM.pdf/9558482)

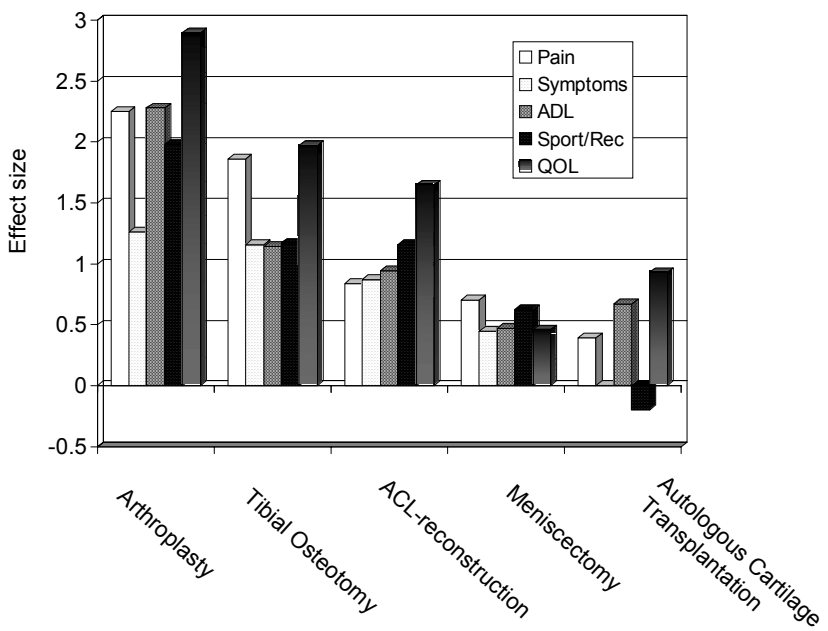

Supplement: MOESM3 [file 9558482]
